# Supplementary material
Source: bioRxiv or medRxiv preprint supplement (https://medrxiv.org/highwire/filestream/93271/field_highwire_adjunct_files/0/2020.08.09.20170977-1.pdf)
Supplement: Supplementary file [file 2020.08.09.20170977-1.pdf]

Supplementary Information file 1 Extraction form

|                     |    |                                                                                                                    |                                                                                                                                                                |
|---------------------|----|--------------------------------------------------------------------------------------------------------------------|----------------------------------------------------------------------------------------------------------------------------------------------------------------|
| Demo-graphics       | 1  | Unique study number                                                                                                |                                                                                                                                                                |
|                     | 2  | year                                                                                                               |                                                                                                                                                                |
|                     | 3  | Week of medical                                                                                                    |                                                                                                                                                                |
|                     | 4  | Age in completed months                                                                                            |                                                                                                                                                                |
|                     | 5  | School status                                                                                                      | Less than mandatory school age/reception – year 6/ year7-11/sixth form - college                                                                               |
|                     | 6  | Special school                                                                                                     | Yes/No                                                                                                                                                         |
|                     | 7  | Sex                                                                                                                | Male/female                                                                                                                                                    |
|                     | 8  | Where does child normally live?                                                                                    | Birth parents/Special Guardian or kinship care/Foster care/Residential home or school/other                                                                    |
| Referral details    | 9  | Index case or referred as sibling/household group for CP medicals (including sibling inpatient with NAI)           | Index case/sibling or household group                                                                                                                          |
|                     | 10 | Who is the allegation against?                                                                                     | Family or household contacts/professionals                                                                                                                     |
|                     | 11 | Source of initial disclosure of potential safeguarding incident (who did child first tell OR who first saw injury) | School or Early Years staff/social care staff /police/family member/ foster carer/medical professional /sibling NAI inpatient/other please state               |
| Social care history | 12 | Was child referred to social care prior to needing this child protection medical?                                  | Yes/No                                                                                                                                                         |
|                     | 13 | If yes:<br>Current social care status at time that concerns were raised which led to this medical.                 | Investigation in progress/support from Family support worker /Child in Need/Child Protection Plan/ Child disability team/referred but NFA/other – please state |
|                     | 14 | Has child ever been on Child Protection Plan?                                                                      | Yes/No                                                                                                                                                         |
| Outcomes            | 15 | Are there any physical findings to support NAI or neglect?                                                         | Yes/No                                                                                                                                                         |
|                     | 16 | If yes:<br>Physical Findings (can choose more than one, exclude accidental injuries)                               | Bruise/Burn /Abrasion/ Scar /implement mark/ human bite mark/laceration/neglect/Other/                                                                         |
|                     | 17 | Likelihood of non-accidental injury (NAI)                                                                          | Injury consistent with NAI/ injury not consistent with NAI or no injury seen                                                                                   |
|                     | 18 | If consistent with NAI: Extent of non-accidental injuries<br>Are there NAI on more than one part of the body?      | Yes/No                                                                                                                                                         |
|                     | 19 | If consistent with NAI:<br>Are there injuries consistent with previous NAI?                                        | Yes/No                                                                                                                                                         |
|                     | 20 | Based on all the evidence in the report does the report indicate significant safeguarding concerns?                | Yes/No<br><i>If No STOP HERE</i>                                                                                                                               |

|  |    |                                                                               |                                                                                                 |
|--|----|-------------------------------------------------------------------------------|-------------------------------------------------------------------------------------------------|
|  | 21 | Are these concerns related to other factors than NAI?                         | Yes/No                                                                                          |
|  | 22 | What are the significant safeguarding concerns?<br>(can choose more than one) | Physical abuse/emotional abuse/<br>domestic violence/neglect/sexual<br>abuse/child exploitation |

Supplementary Table 2 Full details of demographics, referrals, social care history and outcomes.

|                                                                                                   | All        | 2018      | 2019      | 2020      | p    |
|---------------------------------------------------------------------------------------------------|------------|-----------|-----------|-----------|------|
| <b>Sample N</b>                                                                                   | 200        | 78        | 75        | 47        |      |
| <b>Age in months Median (IQR)</b>                                                                 | 69 (85)    | 72.5 (76) | 70 (109)  | 55 (77)   | .598 |
| <b>Gender N Female (%)</b>                                                                        | 73 (36.5)  | 32 (41.0) | 31 (41.3) | 10 (21.3) | .046 |
| <b>School status N (%)</b>                                                                        |            |           |           |           |      |
| Pre-school                                                                                        | 85 (42.5)  | 34 (43.6) | 30 (40.0) | 21 (44.7) |      |
| Primary (Reception – Year 6)                                                                      | 78 (39.0)  | 32 (41.0) | 26 (34.7) | 20 (42.6) |      |
| Secondary (Year 7-11)                                                                             | 32 (16.0)  | 11 (14.1) | 16 (21.3) | 5 (10.6)  |      |
| College / 6 <sup>th</sup> form (Year 12-13)                                                       | 5 (2.5)    | 1 (1.3)   | 3 (4.0)   | 1 (2.1)   | .637 |
| <b>Special school N Yes (%)</b>                                                                   | 9 (4.5)    | 5 (6.4)   | 3 (4.0)   | 1 (2.1)   | .516 |
| <b>Where child lives N (%)</b>                                                                    |            |           |           |           |      |
| Birth parents                                                                                     | 176 (88)   | 69 (88.5) | 65 (86.7) | 42 (89.4) |      |
| Special Guardianship or kinship care                                                              | 12 (6.0)   | 3 (3.8)   | 6 (8.0)   | 3 (6.4)   |      |
| Foster care                                                                                       | 7 (3.5)    | 5 (6.4)   | 2 (2.7)   | 0 (0.0)   |      |
| Residential home or school                                                                        | 3 (1.5)    | 1 (1.3)   | 2 (2.7)   | 0 (0.0)   |      |
| Other                                                                                             | 2 (1.0)    | 0 (0.0)   | 0 (0.0)   | 2 (1.0)   | .121 |
| <b>Is child an index case (vs sibling or household contact) N Yes (%)</b>                         | 134 (67)   | 46 (59.0) | 56 (74.7) | 32 (68.1) | .117 |
| <b>Allegation against N (%)</b>                                                                   |            |           |           |           |      |
| Family or household                                                                               | 189 (94.5) | 73 (93.6) | 70 (93.3) | 46 (97.9) |      |
| Professional                                                                                      | 11 (5.5)   | 5 (6.4)   | 5 (6.7)   | 1 (2.1)   | .509 |
| <b>Source of referral (who did child disclose abuse to, or who initiated CPME referral) N (%)</b> |            |           |           |           |      |
| School or Early Years staff                                                                       | 86 (43.9)  | 36 (47.4) | 38 (52.1) | 12 (25.5) |      |
| Social care staff                                                                                 | 22 (11.2)  | 10 (13.2) | 3 (4.1)   | 9 (19.1)  |      |
| Police                                                                                            | 22 (11.2)  | 11 (14.5) | 7 (9.6)   | 4 (8.5)   |      |
| Family member                                                                                     | 36 (18.4)  | 9 (11.8)  | 17 (23.3) | 10 (21.3) |      |
| Medical professional                                                                              | 4 (2.0)    | 2 (2.6)   | 2 (2.7)   | 0 (0.0)   |      |
| Foster carer                                                                                      | 7 (3.6)    | 1 (1.3)   | 2 (2.7)   | 4 (8.5)   |      |
| Sibling current inpatient due to NAI                                                              | 12 (6.1)   | 6 (7.9)   | 1 (1.4)   | 5 (10.6)  |      |
| Other                                                                                             | 7 (3.6)    | 1 (1.3)   | 3 (4.1)   | 3 (6.4)   | .015 |
| <b>Was child known to social care prior to CPME referral? N Yes (%)</b>                           | 151 (75.9) | 58 (74.4) | 56 (75.7) | 37 (78.7) | .857 |
| <b>Is child an open case to social care now N Yes (%)</b>                                         | 106 (53.3) | 39 (50.0) | 38 (51.4) | 29 (61.7) | .409 |
| <b>Has child ever been on CP plan N Yes (%)</b>                                                   | 77 (38.7)  | 26 (33.3) | 29 (39.2) | 22 (46.8) | .323 |

|                                                                                     |            |           |           |           |      |
|-------------------------------------------------------------------------------------|------------|-----------|-----------|-----------|------|
| <b>Are there physical findings to support NAI or neglect <i>N Yes (%)</i></b>       | 98 (51.0)  | 32 (41.0) | 46 (59.0) | 27 (57.4) | .071 |
| <b>Physical findings</b>                                                            |            |           |           |           |      |
| Bruise                                                                              | 128        | 21        | 25        | 21        |      |
| Burn                                                                                | 36         | 2         | 2         | 2         |      |
| Abrasion                                                                            | 29         | 7         | 10        | 7         |      |
| Scar                                                                                | 11         | 3         | 3         | 3         |      |
| Implement mark                                                                      | 9          | 6         | 1         | 2         |      |
| Human bite mark                                                                     | 6          | 2         | 1         | 2         |      |
| Laceration                                                                          | 5          | 1         | 2         | 2         |      |
| Neglect                                                                             | 19         | 7         | 6         | 6         |      |
| Other                                                                               | 4          | 1         | 0         | 3         |      |
| <b>Number of types of NAI <i>Median (IQR)</i></b>                                   | 1 (1)      | 1 (1)     | 1 (1)     | 1.5 (1)   | .277 |
| <b>Likelihood of NAI <i>N Consistent with NAI (%)</i></b>                           | 89 (46.4)  | 28 (35.9) | 35 (52.2) | 26 (55.3) | .053 |
| <b>NAI on more than one part of body <i>N Yes (%)</i></b>                           | 48 (54.5)  | 16 (57.1) | 18 (52.9) | 14 (53.8) | .943 |
| <b>Are there injuries consistent with previous NAI? <i>N Yes (%)</i></b>            | 15 (17.2)  | 4 (14.8)  | 4 (11.8)  | 7 (26.9)  | .282 |
| <b>Does the report indicate significant safeguarding concerns? <i>N Yes (%)</i></b> | 180 (93.8) | 69 (88.5) | 64 (95.5) | 47 (100)  | .014 |
| <b>Are there concerns related to non-NAI safeguarding factors? <i>N Yes (%)</i></b> | 132 (73.3) | 52 (75.4) | 47 (73.4) | 33 (70.2) | .898 |
| <b>Other safeguarding concerns</b>                                                  |            |           |           |           |      |
| Physical abuse                                                                      | 154        | 59        | 54        | 41        |      |
| Emotional abuse                                                                     | 34         | 13        | 15        | 6         |      |
| Domestic violenc                                                                    | 60         | 24        | 25        | 11        |      |
| Neglect                                                                             | 62         | 25        | 1         | 19        |      |
| Sexual abuse                                                                        | 4          | 1         | 2         | 1         |      |
| Child exploitation                                                                  | 7          | 3         | 2         | 2         | .845 |

STROBE Statement—checklist of items that should be included in reports of observational studies

|                           | <b>Item No</b> | <b>Recommendation</b>                                                                               | <b>Page No</b> |
|---------------------------|----------------|-----------------------------------------------------------------------------------------------------|----------------|
| <b>Title and abstract</b> | 1              | (a) Indicate the study's design with a commonly used term in the title or the abstract              | 3              |
|                           |                | (b) Provide in the abstract an informative and balanced summary of what was done and what was found | 3              |
| <b>Introduction</b>       |                |                                                                                                     |                |

|                              |    |                                                                                                                                                                                                                                                                                                                                                                                                                                                                                |                                            |
|------------------------------|----|--------------------------------------------------------------------------------------------------------------------------------------------------------------------------------------------------------------------------------------------------------------------------------------------------------------------------------------------------------------------------------------------------------------------------------------------------------------------------------|--------------------------------------------|
| Background/rationale         | 2  | Explain the scientific background and rationale for the investigation being reported                                                                                                                                                                                                                                                                                                                                                                                           | 4-5                                        |
| Objectives                   | 3  | State specific objectives, including any prespecified hypotheses                                                                                                                                                                                                                                                                                                                                                                                                               | 5                                          |
| <b>Methods</b>               |    |                                                                                                                                                                                                                                                                                                                                                                                                                                                                                |                                            |
| Study design                 | 4  | Present key elements of study design early in the paper                                                                                                                                                                                                                                                                                                                                                                                                                        | 5                                          |
| Setting                      | 5  | Describe the setting, locations, and relevant dates, including periods of recruitment, exposure, follow-up, and data collection                                                                                                                                                                                                                                                                                                                                                | 5                                          |
| Participants                 | 6  | (a) <i>Cohort study</i> —Give the eligibility criteria, and the sources and methods of selection of participants. Describe methods of follow-up<br><br><i>Case-control study</i> —Give the eligibility criteria, and the sources and methods of case ascertainment and control selection. Give the rationale for the choice of cases and controls<br><br><i>Cross-sectional study</i> —Give the eligibility criteria, and the sources and methods of selection of participants | 5                                          |
|                              |    | (b) <i>Cohort study</i> —For matched studies, give matching criteria and number of exposed and unexposed<br><br><i>Case-control study</i> —For matched studies, give matching criteria and the number of controls per case                                                                                                                                                                                                                                                     | n/a                                        |
|                              |    |                                                                                                                                                                                                                                                                                                                                                                                                                                                                                |                                            |
| Variables                    | 7  | Clearly define all outcomes, exposures, predictors, potential confounders, and effect modifiers. Give diagnostic criteria, if applicable                                                                                                                                                                                                                                                                                                                                       | 5-6                                        |
| Data sources/<br>measurement | 8* | For each variable of interest, give sources of data and details of methods of assessment (measurement). Describe comparability of assessment methods if there is more than one group                                                                                                                                                                                                                                                                                           | 5<br><br><i>Figures 1 &amp; 2, Table 1</i> |
| Bias                         | 9  | Describe any efforts to address potential sources of bias                                                                                                                                                                                                                                                                                                                                                                                                                      | 6                                          |
| Study size                   | 10 | Explain how the study size was arrived at                                                                                                                                                                                                                                                                                                                                                                                                                                      | 6                                          |
| Quantitative variables       | 11 | Explain how quantitative variables were handled in the analyses. If applicable, describe which groupings were chosen and why                                                                                                                                                                                                                                                                                                                                                   | 5-6                                        |
| Statistical methods          | 12 | (a) Describe all statistical methods, including those used to control for confounding                                                                                                                                                                                                                                                                                                                                                                                          | 6                                          |
|                              |    | (b) Describe any methods used to examine subgroups and interactions                                                                                                                                                                                                                                                                                                                                                                                                            | 6                                          |
|                              |    | (c) Explain how missing data were addressed                                                                                                                                                                                                                                                                                                                                                                                                                                    | n/a                                        |

|                                                                                                                                                                                                                                                                                                                       |     |
|-----------------------------------------------------------------------------------------------------------------------------------------------------------------------------------------------------------------------------------------------------------------------------------------------------------------------|-----|
| <p><i>(d) Cohort study</i>—If applicable, explain how loss to follow-up was addressed</p> <p><i>Case-control study</i>—If applicable, explain how matching of cases and controls was addressed</p> <p><i>Cross-sectional study</i>—If applicable, describe analytical methods taking account of sampling strategy</p> | n/a |
| <i>(e)</i> Describe any sensitivity analyses                                                                                                                                                                                                                                                                          | n/a |

## Results

|                  |     |                                                                                                                                                                                                              |                |
|------------------|-----|--------------------------------------------------------------------------------------------------------------------------------------------------------------------------------------------------------------|----------------|
| Participants     | 13* | (a) Report numbers of individuals at each stage of study—eg numbers potentially eligible, examined for eligibility, confirmed eligible, included in the study, completing follow-up, and analysed            | 7              |
|                  |     | (b) Give reasons for non-participation at each stage                                                                                                                                                         |                |
|                  |     | (c) Consider use of a flow diagram                                                                                                                                                                           |                |
| Descriptive data | 14* | (a) Give characteristics of study participants (eg demographic, clinical, social) and information on exposures and potential confounders                                                                     | 8              |
|                  |     | (b) Indicate number of participants with missing data for each variable of interest                                                                                                                          | 8              |
|                  |     | (c) <i>Cohort study</i> —Summarise follow-up time (eg, average and total amount)                                                                                                                             | n/a            |
| Outcome data     | 15* | <i>Cohort study</i> —Report numbers of outcome events or summary measures over time                                                                                                                          | n/a            |
|                  |     | <i>Case-control study</i> —Report numbers in each exposure category, or summary measures of exposure                                                                                                         | n/a            |
|                  |     | <i>Cross-sectional study</i> —Report numbers of outcome events or summary measures                                                                                                                           | 7-8<br>Table 1 |
| Main results     | 16  | (a) Give unadjusted estimates and, if applicable, confounder-adjusted estimates and their precision (eg, 95% confidence interval). Make clear which confounders were adjusted for and why they were included | 8-9            |
|                  |     | (b) Report category boundaries when continuous variables were categorized                                                                                                                                    |                |
|                  |     | (c) If relevant, consider translating estimates of relative risk into absolute risk for a meaningful time period                                                                                             |                |
| Other analyses   | 17  | Report other analyses done—eg analyses of subgroups and interactions, and sensitivity analyses                                                                                                               | n/a            |

## Discussion

|                  |    |                                                                                                                                                                            |      |
|------------------|----|----------------------------------------------------------------------------------------------------------------------------------------------------------------------------|------|
| Key results      | 18 | Summarise key results with reference to study objectives                                                                                                                   | 8    |
| Limitations      | 19 | Discuss limitations of the study, taking into account sources of potential bias or imprecision. Discuss both direction and magnitude of any potential bias                 | 8-9  |
| Interpretation   | 20 | Give a cautious overall interpretation of results considering objectives, limitations, multiplicity of analyses, results from similar studies, and other relevant evidence | 9-10 |
| Generalisability | 21 | Discuss the generalisability (external validity) of the study results                                                                                                      | 9-10 |

## Other information

---

|         |    |                                                                                                                                                               |    |
|---------|----|---------------------------------------------------------------------------------------------------------------------------------------------------------------|----|
| Funding | 22 | Give the source of funding and the role of the funders for the present study and, if applicable, for the original study on which the present article is based | 12 |
|---------|----|---------------------------------------------------------------------------------------------------------------------------------------------------------------|----|
